# Supplementary material for: Zyflamend induces apoptosis in pancreatic cancer cells via modulation of the JNK pathway
Source: PubMed Central journal article supplement (PMC7427957; doi:10.1186/s12964-020-00609-7), 2020-08-14

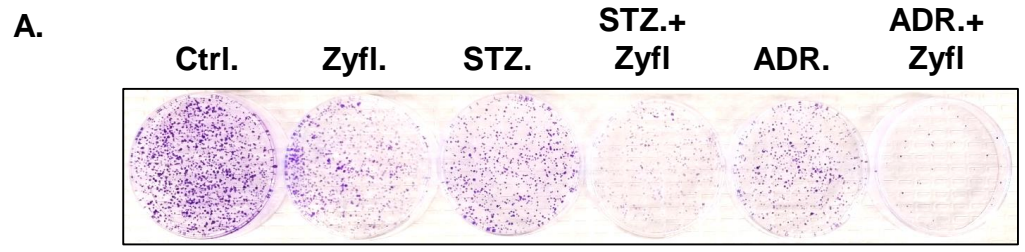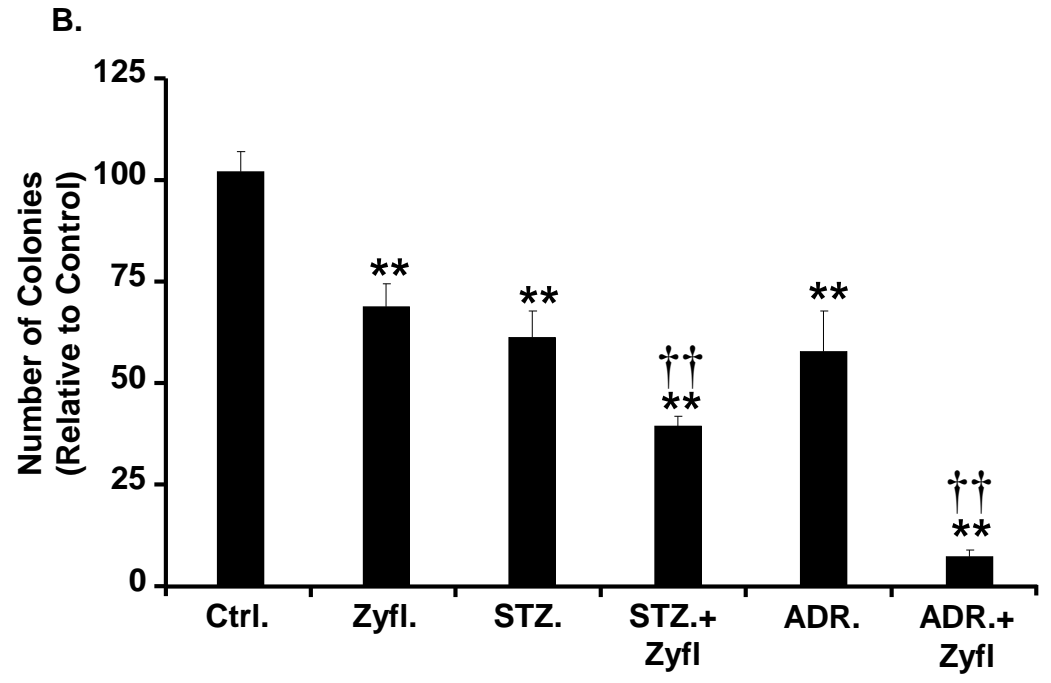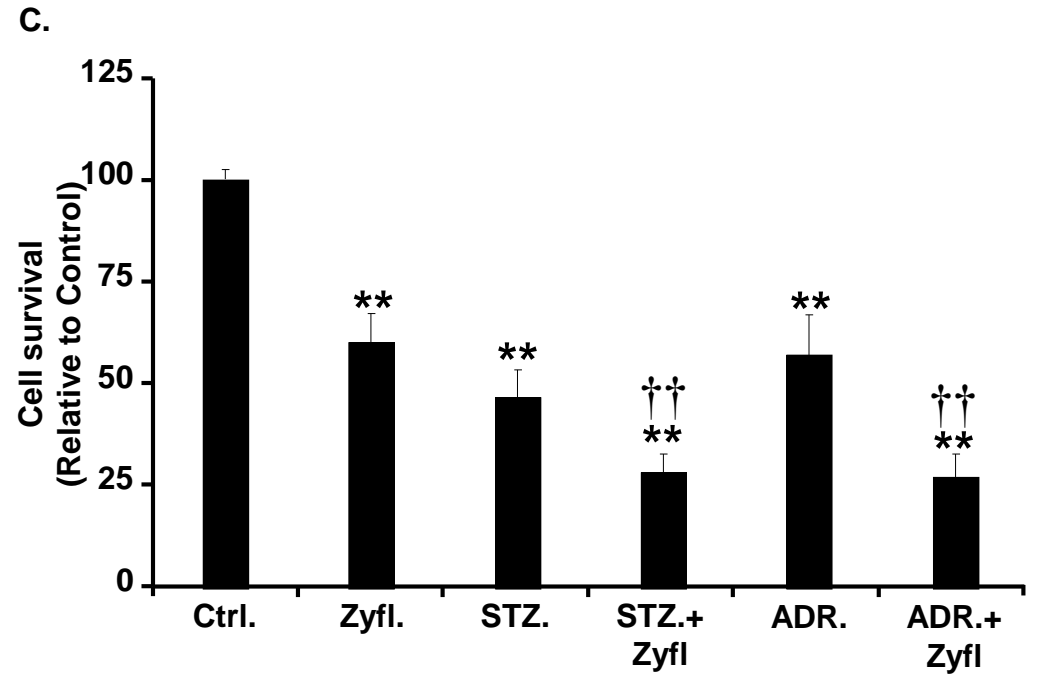

D.

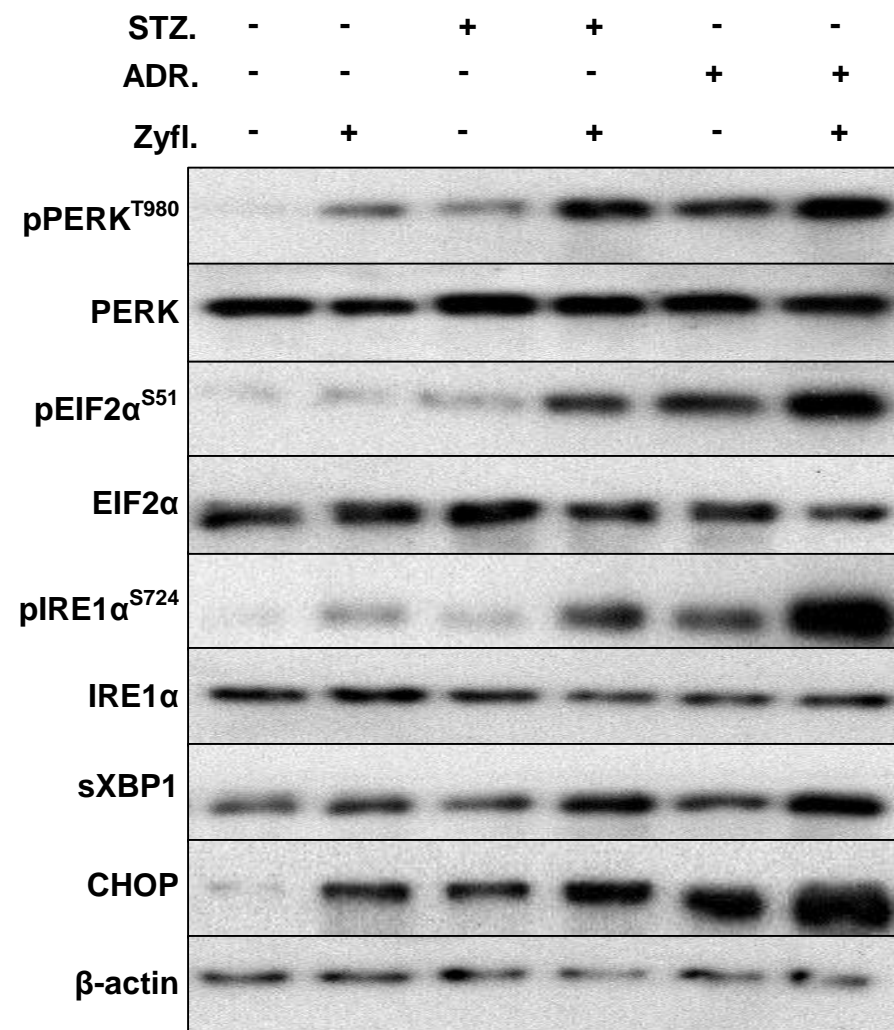

E.

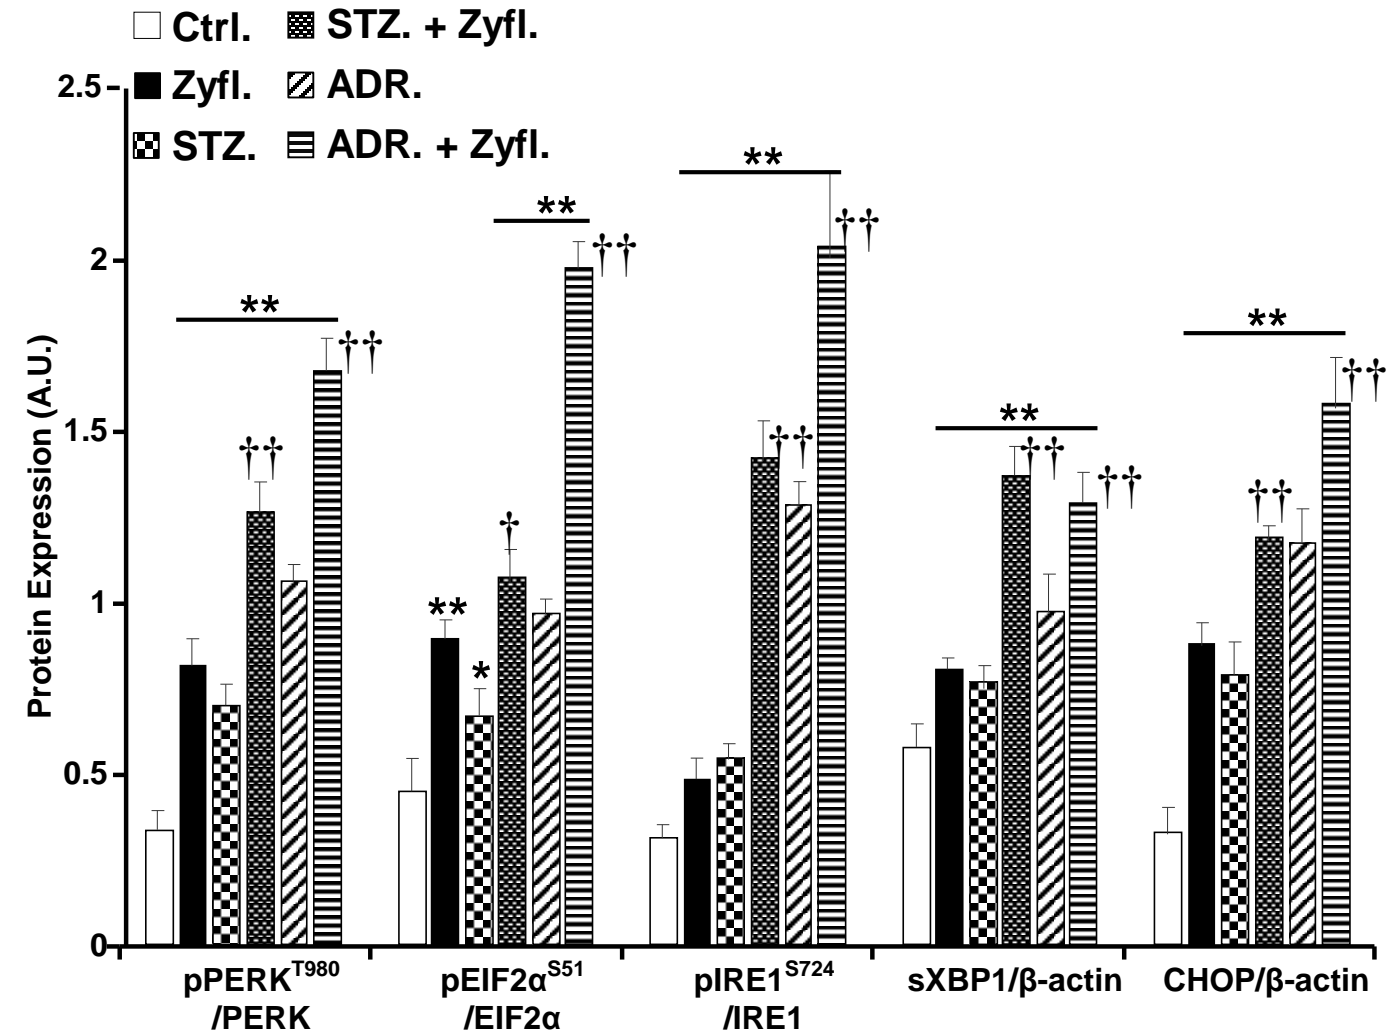

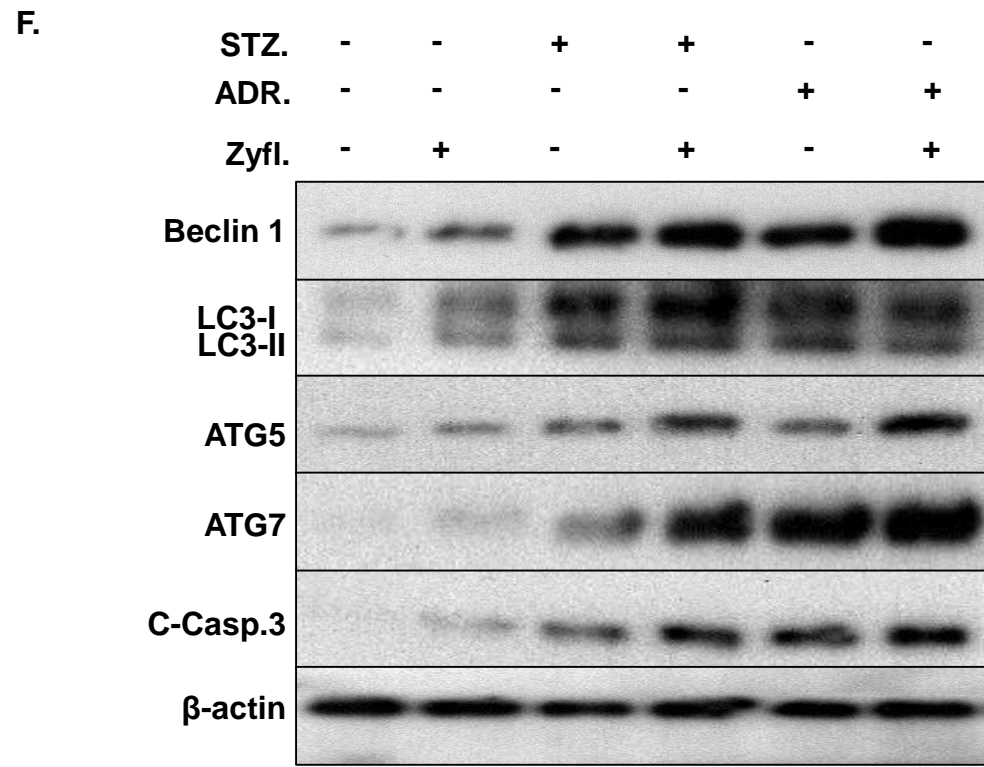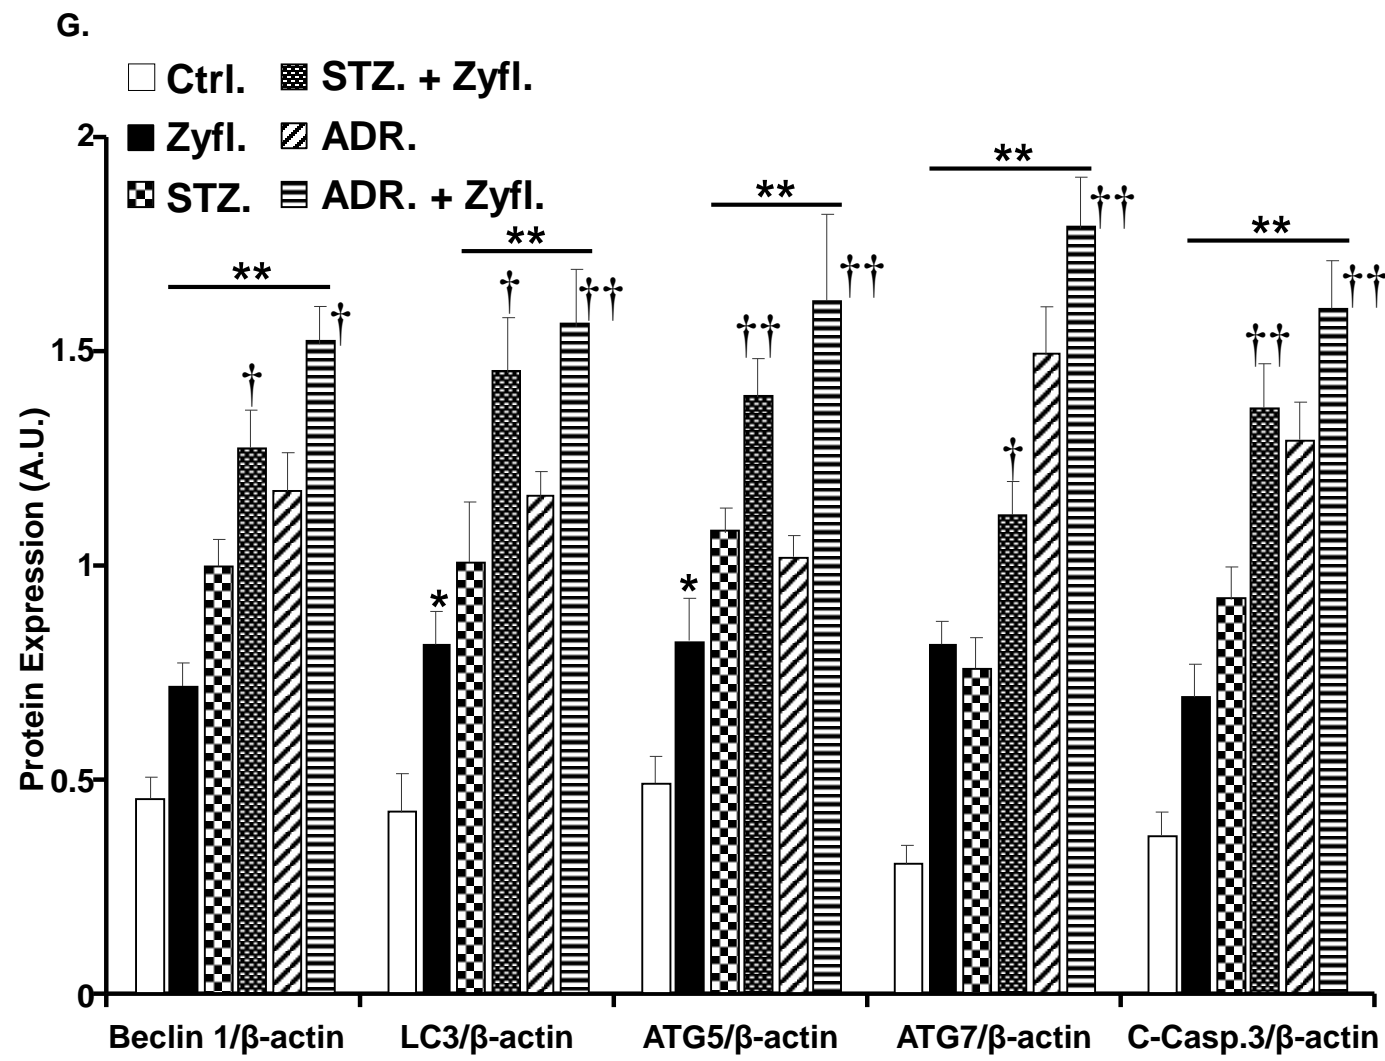

Supplement: 12964_2020_609_MOESM2_ESM.pdf [file 12964_2020_609_MOESM2_ESM.pdf]
